# Supplementary material for: A disrupted RNA editing balance mediated by ADARs (Adenosine DeAminases that act on RNA) in human hepatocellular carcinoma
Source: HighWire-hosted journal article supplement (doi:10.1136/gutjnl-2012-304037), 2013-06-13
Supplement: gutjnl-2012-304037supp_table5.pdf [file gutjnl-2012-304037supp_table5.pdf]

**Supplementary Table 5.** List of potential tumor-specific editing sites within coding regions in 3 pairs of HCC and matched NT liver samples.

| Chr | Position  | Ref. <sup>1</sup> | Var. <sup>2</sup> | No of Ref. reads | No. of Var. reads | Frequency (%) | Depth | Type <sup>3</sup> | Annotation Details                                                                                                                                                                                                   | 448 T | 473 T | 510 T |
|-----|-----------|-------------------|-------------------|------------------|-------------------|---------------|-------|-------------------|----------------------------------------------------------------------------------------------------------------------------------------------------------------------------------------------------------------------|-------|-------|-------|
| 2   | 216236742 | T                 | C                 | 403              | 54                | 11.34         | 457   | nonsyn SNV        | FN1:NM_212476:exon38:c.A6061G:p.T2021A, FN1:NM_212482:exon40:c.A6604G:p.T2202A                                                                                                                                       | Y     | Y     | Y     |
| 15  | 76578730  | T                 | C                 | 72               | 10                | 10.2          | 82    | nonsyn SNV        | ETFA:NM_001127716:exon5:c.A397G:p.S133G, ETFA:NM_000126:exon6:c.A544G:p.S182G                                                                                                                                        | Y     | Y     | Y     |
| 17  | 80445942  | A                 | G                 | 14               | 5                 | 21.74         | 19    | nonsyn SNV        | NARF:NM_031968:exon12:c.A1418G:p.E473G, NARF:NM_001038618:exon11:c.A1103G:p.E368G, NARF:NM_001083608:exon10:c.A1136G:p.E379G, NARF:NM_012336:exon11:c.A1280G:p.E427G                                                 | Y     | Y     | Y     |
| 1   | 156182847 | A                 | G                 | 11               | 2                 | 11.76         | 13    | nonsyn SNV        | PMF1:NM_001199653:exon1:c.A41G:p.E14G, PMF1-BGLAP:NM_001199661:exon1:c.A41G:p.E14G, PMF1-BGLAP:NM_001199663:exon1:c.A41G:p.E14G, PMF1:NM_001199654:exon1:c.A41G:p.E14G                                               | Y     | Y     | N     |
| 1   | 225974614 | A                 | G                 | 29               | 23                | 42.59         | 52    | nonsyn SNV        | SRP9:NM_001130440:exon3:c.A192G:p.I64M                                                                                                                                                                               | Y     | Y     | N     |
| 5   | 108713940 | T                 | C                 | 15               | 2                 | 11.11         | 17    | syn SNV           | PJA2:NM_014819:exon4:c.A1248G:p.G416G                                                                                                                                                                                | Y     | Y     | N     |
| 5   | 138661339 | A                 | G                 | 26               | 5                 | 15.62         | 31    | nonsyn SNV        | MATR3:NM_001194955:exon13:c.A2359G:p.N787D, MATR3:NM_199189:exon16:c.A2359G:p.N787D, MATR3:NM_001194954:exon15:c.A2359G:p.N787D, MATR3:NM_018834:exon13:c.A2359G:p.N787D, MATR3:NM_001194956:exon12:c.A1495G:p.N499D | Y     | Y     | N     |

|    |           |   |   |     |    |       |     |            |                                                                                                                                                                 |   |   |   |
|----|-----------|---|---|-----|----|-------|-----|------------|-----------------------------------------------------------------------------------------------------------------------------------------------------------------|---|---|---|
| 6  | 31752021  | T | C | 56  | 7  | 11.11 | 63  | syn SNV    | VAR5:NM_006295:exon13:c.A1641G:p.V547V                                                                                                                          | Y | Y | N |
| 6  | 44219221  | A | G | 20  | 6  | 20.69 | 26  | nonsyn SNV | HSP90AB1:NM_007355:exon8:c.A1190G:p.Q397R                                                                                                                       | Y | Y | N |
| 12 | 67701215  | A | G | 19  | 4  | 16    | 23  | nonsyn SNV | CAND1:NM_018448:exon11:c.A2968G:p.K990E                                                                                                                         | Y | Y | N |
| 1  | 36921393  | T | C | 10  | 3  | 23.08 | 13  | nonsyn SNV | MRPS15:NM_031280:exon8:c.A770G:p.Q257R                                                                                                                          | Y | N | Y |
| 2  | 198353049 | T | C | 13  | 2  | 12.5  | 15  | nonsyn SNV | HSPD1:NM_002156:exon10:c.A1382G:p.Q461R,HSPD1:NM_199440:exon10:c.A1382G:p.Q461R                                                                                 | Y | N | Y |
| 3  | 50112710  | A | G | 10  | 3  | 16.67 | 13  | nonsyn SNV | RBM6:NM_005777:exon20:c.A3193G:p.R1065G,RBM6:NM_001167582:exon16:c.A1627G:p.R543G                                                                               | Y | N | Y |
| 8  | 97243292  | T | C | 364 | 50 | 10.94 | 414 | syn SNV    | UQCRB:NM_006294:exon4:c.A327G:p.A109A,UQCRB:NM_001199975:exon5:c.A231G:p.A77A                                                                                   | Y | N | Y |
| 10 | 5010523   | A | G | 67  | 11 | 12.09 | 78  | nonsyn SNV | AKR1C1:NM_001353:exon4:c.A392G:p.K131R                                                                                                                          | Y | N | Y |
| 11 | 18424543  | A | G | 26  | 4  | 12.5  | 30  | nonsyn SNV | LDHA:NM_001135239:exon4:c.A401G:p.E134G,LDHA:NM_001165414:exon5:c.A662G:p.E221G,LDHA:NM_001165415:exon5:c.A575G:p.E192G,LDHA:NM_001165416:exon5:c.A575G:p.E192G | Y | N | Y |
| 11 | 62289306  | T | C | 28  | 4  | 11.76 | 32  | nonsyn SNV | AHNAK:NM_001620:exon5:c.A12583G:p.K4195E                                                                                                                        | Y | N | Y |
| 11 | 94801227  | A | G | 35  | 5  | 12.2  | 40  | syn SNV    | SRSF8:NM_032102:exon1:c.A837G:p.R279R                                                                                                                           | Y | N | Y |
| 13 | 25670574  | A | G | 28  | 7  | 19.44 | 35  | nonsyn SNV | PABPC3:NM_030979:exon1:c.A238G:p.K80E                                                                                                                           | Y | N | Y |
| 13 | 41515296  | T | C | 22  | 5  | 11.63 | 27  | syn SNV    | ELF1:NM_172373:exon8:c.A1017G:p.G339G,ELF1:NM_001145353:exon7:c.A945G:p.G315G                                                                                   | Y | N | Y |

|    |           |   |   |    |    |       |    |               |                                                                                                                                 |   |   |   |
|----|-----------|---|---|----|----|-------|----|---------------|---------------------------------------------------------------------------------------------------------------------------------|---|---|---|
| 13 | 52604985  | A | G | 6  | 7  | 53.85 | 13 | nonsyn<br>SNV | UTP14C:NM_021645:exon2:c.A2045G:p.Q682R                                                                                         | Y | N | Y |
| 16 | 67231545  | A | G | 48 | 7  | 12.28 | 55 | syn SNV       | E2F4:NM_001950:exon8:c.A1077G:p.T359T                                                                                           | Y | N | Y |
| 18 | 20572889  | A | G | 27 | 3  | 10    | 30 | nonsyn<br>SNV | RBBP8:NM_203291:exon11:c.A1099G:p.T367A,RBBP8<br>:NM_203292:exon11:c.A1099G:p.T367A,RBBP8:NM_0<br>02894:exon11:c.A1099G:p.T367A | Y | N | Y |
| X  | 27766155  | A | G | 14 | 16 | 50    | 30 | syn SNV       | DCAF8L2:NM_001136533:exon1:c.A1143G:p.Q381Q                                                                                     | Y | N | Y |
| X  | 27766172  | A | G | 14 | 26 | 59.09 | 40 | nonsyn<br>SNV | DCAF8L2:NM_001136533:exon1:c.A1160G:p.Q387R                                                                                     | Y | N | Y |
| 1  | 35925949  | T | C | 16 | 2  | 10.53 | 18 | nonsyn<br>SNV | KIAA0319L:NM_024874:exon9:c.A1384G:p.I462V                                                                                      | N | Y | Y |
| 1  | 222895848 | A | G | 13 | 2  | 10.53 | 15 | syn SNV       | BROX:NM_144695:exon5:c.A393G:p.G131G                                                                                            | N | Y | Y |
| 2  | 99234730  | A | G | 27 | 3  | 10    | 30 | nonsyn<br>SNV | UNC50:NM_014044:exon6:c.A743G:p.H248R                                                                                           | N | Y | Y |
| 3  | 194149599 | T | C | 25 | 3  | 10.34 | 28 | syn SNV       | ATP13A3:NM_024524:exon27:c.A2922G:p.A974A                                                                                       | N | Y | Y |
| 7  | 56122076  | A | G | 33 | 6  | 13.33 | 39 | syn SNV       | CCT6A:NM_001762:exon3:c.A216G:p.P72P                                                                                            | N | Y | Y |
| 9  | 6013849   | T | C | 13 | 11 | 44    | 24 | nonsyn<br>SNV | RANBP6:NM_012416:exon1:c.A1759G:p.N587D                                                                                         | N | Y | Y |
| 9  | 6013859   | T | C | 12 | 11 | 45.83 | 23 | syn SNV       | RANBP6:NM_012416:exon1:c.A1749G:p.Q583Q                                                                                         | N | Y | Y |
| 11 | 86055746  | A | G | 43 | 5  | 10.2  | 48 | syn SNV       | C11orf73:NM_016401:exon4:c.A522G:p.A174A                                                                                        | N | Y | Y |
| 12 | 9230302   | T | C | 14 | 4  | 21.05 | 18 | nonsyn<br>SNV | A2M:NM_000014:exon26:c.A3271G:p.I1091V                                                                                          | N | Y | Y |
| 12 | 49315778  | T | C | 27 | 4  | 12.5  | 31 | nonsyn<br>SNV | FKBP11:NM_016594:exon6:c.A595G:p.K199E,FKBP11<br>:NM_001143781:exon5:c.A289G:p.K97E                                             | N | Y | Y |
| 13 | 46090371  | A | G | 19 | 3  | 13.04 | 22 | nonsyn<br>SNV | COG3:NM_031431:exon17:c.A1903G:p.I635V                                                                                          | N | Y | Y |

|    |          |   |   |    |   |       |    |               |                                         |   |   |   |
|----|----------|---|---|----|---|-------|----|---------------|-----------------------------------------|---|---|---|
| 13 | 52604264 | A | G | 17 | 5 | 22.73 | 22 | nonsyn<br>SNV | UTP14C:NM_021645:exon2:c.A1324G:p.S442G | N | Y | Y |
| 13 | 52604288 | A | G | 18 | 5 | 21.74 | 23 | nonsyn<br>SNV | UTP14C:NM_021645:exon2:c.A1348G:p.S450G | N | Y | Y |
| 21 | 34948722 | A | G | 10 | 4 | 28.57 | 14 | nonsyn<br>SNV | SON:NM_138927:exon12:c.A7273G:p.R2425G  | N | Y | Y |
| 13 | 52604434 | A | G | 17 | 5 | 22.73 | 22 | syn SNV       | UTP14C:NM_021645:exon2:c.A1494G:p.L498L | N | Y | Y |

<sup>1</sup> Ref.=Reference;

<sup>2</sup> Var.=Variation

<sup>3</sup> Nonsyn, nonsynonymous; Syn, synonymous
