# Supplementary material for: A disrupted RNA editing balance mediated by ADARs (Adenosine DeAminases that act on RNA) in human hepatocellular carcinoma
Source: HighWire-hosted journal article supplement (doi:10.1136/gutjnl-2012-304037), 2013-06-13
Supplement: gutjnl-2012-304037supp_table7.pdf [file gutjnl-2012-304037supp_table7.pdf]

**Supplementary Table 7.** IHC scores of ADAR1 in 92 pairs of primary HCCs and matched non-tumor liver tissues.

|                                       |          | IHC scores of T (no. of sections) |           |           |           | Total      |
|---------------------------------------|----------|-----------------------------------|-----------|-----------|-----------|------------|
|                                       |          | <b>0</b>                          | <b>1</b>  | <b>2</b>  | <b>3</b>  |            |
| IHC scores of NT<br>(No. of sections) | <b>0</b> | 8                                 | <b>10</b> | <b>11</b> | <b>4</b>  | 33 (35.9%) |
|                                       | <b>1</b> | 2                                 | 8         | <b>25</b> | <b>13</b> | 48 (52.2%) |
|                                       | <b>2</b> | 2                                 | 2         | 4         | <b>3</b>  | 11 (11.9%) |
| Total                                 |          | 12                                | 20        | 40        | 20        | 92         |
|                                       |          | (13.0%)                           | (21.7%)   | (43.5%)   | (21.7%)   |            |
